# Supplementary material for: Microbial Diversity and Toxin Risk in Tropical Freshwater Reservoirs of Cape Verde
Source: PubMed Central journal article supplement (PMC5983242; doi:10.3390/toxins10050186), 2018-05-05
Supplement: toxins-10-00186-s001.pdf [file toxins-10-00186-s001.pdf]

# Supplementary Materials: Microbial Diversity and Toxin Risk in Tropical Freshwater Reservoirs of Cape Verde

Ana P. Semedo-Aguiar, Jose B. Pereira-Leal and Ricardo B. Leite

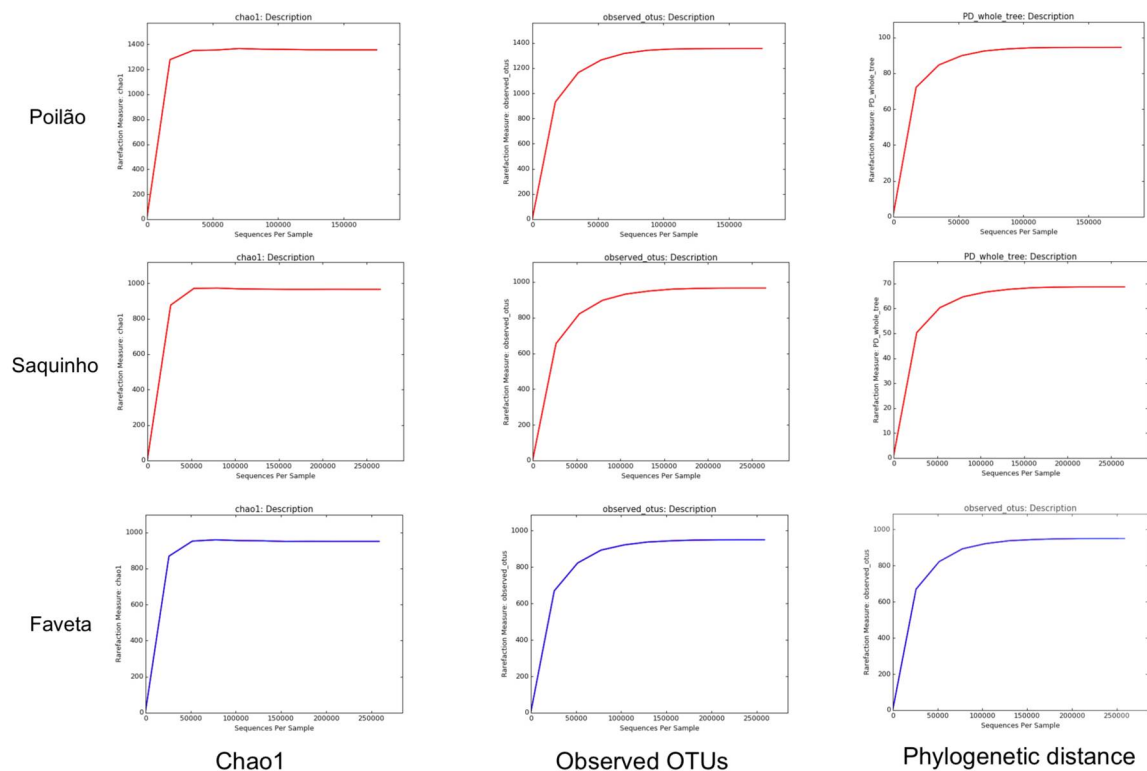

**Figure S1.** Rarefaction curves per number of reads for each sampled reservoir. Representation based in Chao1, Observed OTUs and Phylogenetic distance whole tree of the 16sRNA gene amplicons of Illumina sequencing.

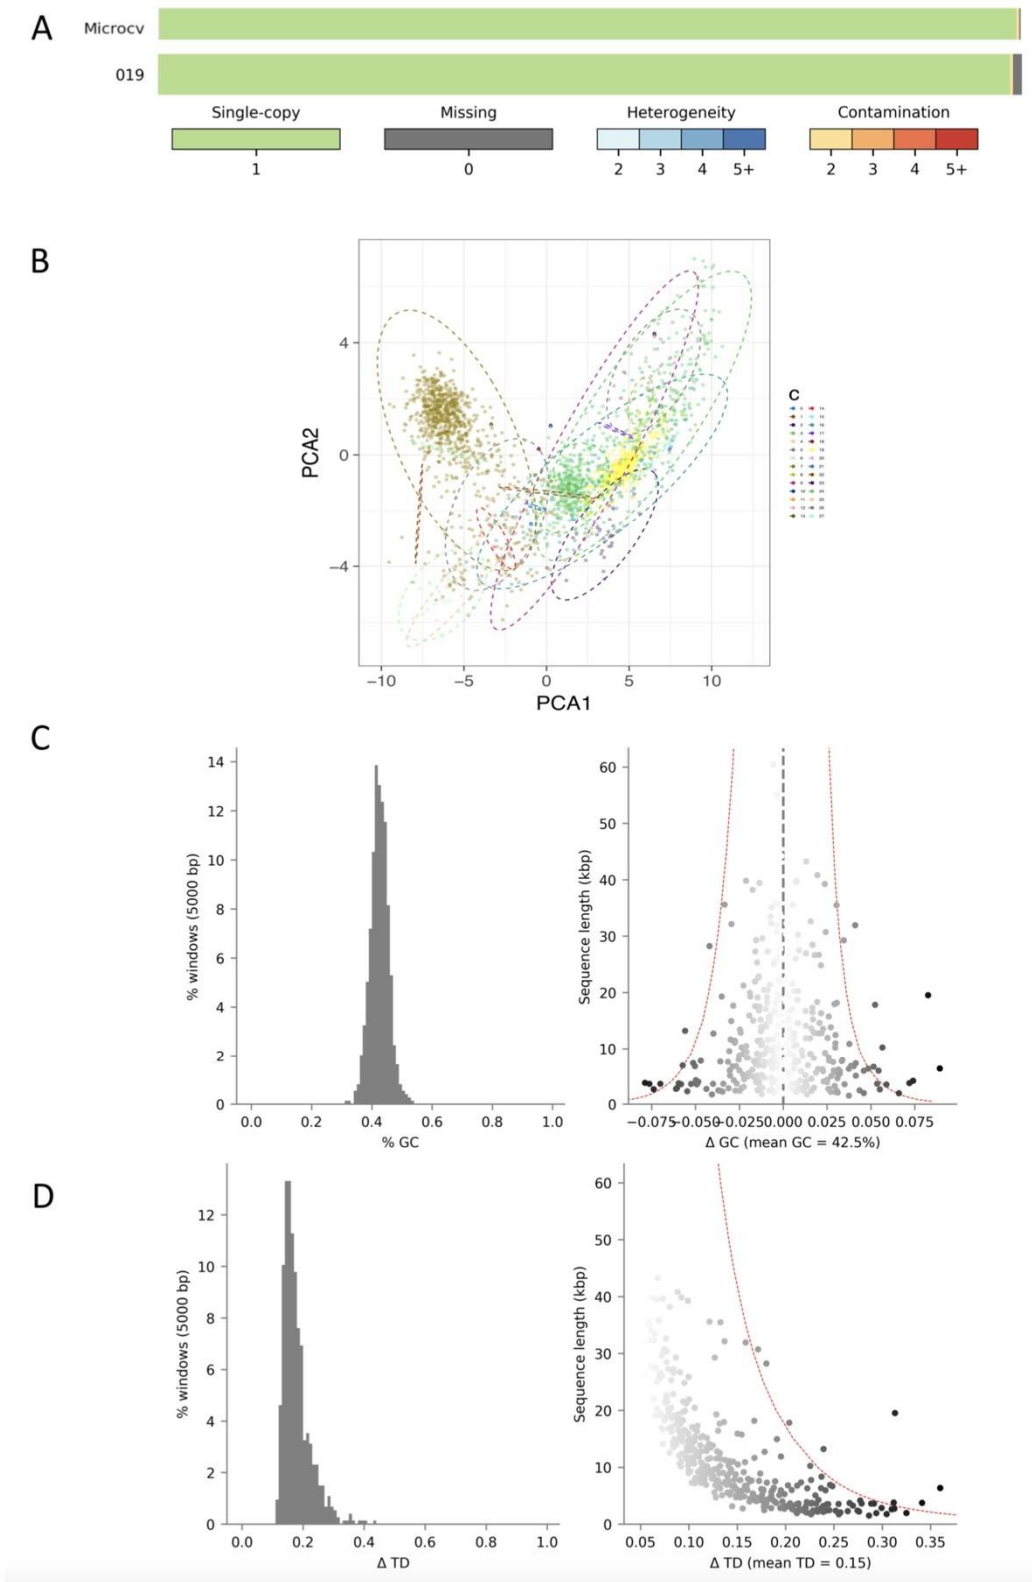

**Figure S2.** Faveta reservoir. Degree of completeness and contamination of the *M. cf. aeruginosa* CV01 bin detected using CONCOCT and assembly produced by SPAdes (panel A), Graphical representation of a PCA of clusters based on composition and coverage (bin 19 in yellow). Left Panel C --- Histogram of GC distribution of sequences within bin 19, Right Panel C --- Deviation of the average of the entire assembly, x--- axis represents GC and y---axis the size. Left Panel D --- Histogram of Manhattan distance between tetranucleotide signature of bin 19 and the entire assembly, Right Panel D --- Deviation of the average of the entire assembly, x axis represents GC and y axis the size.

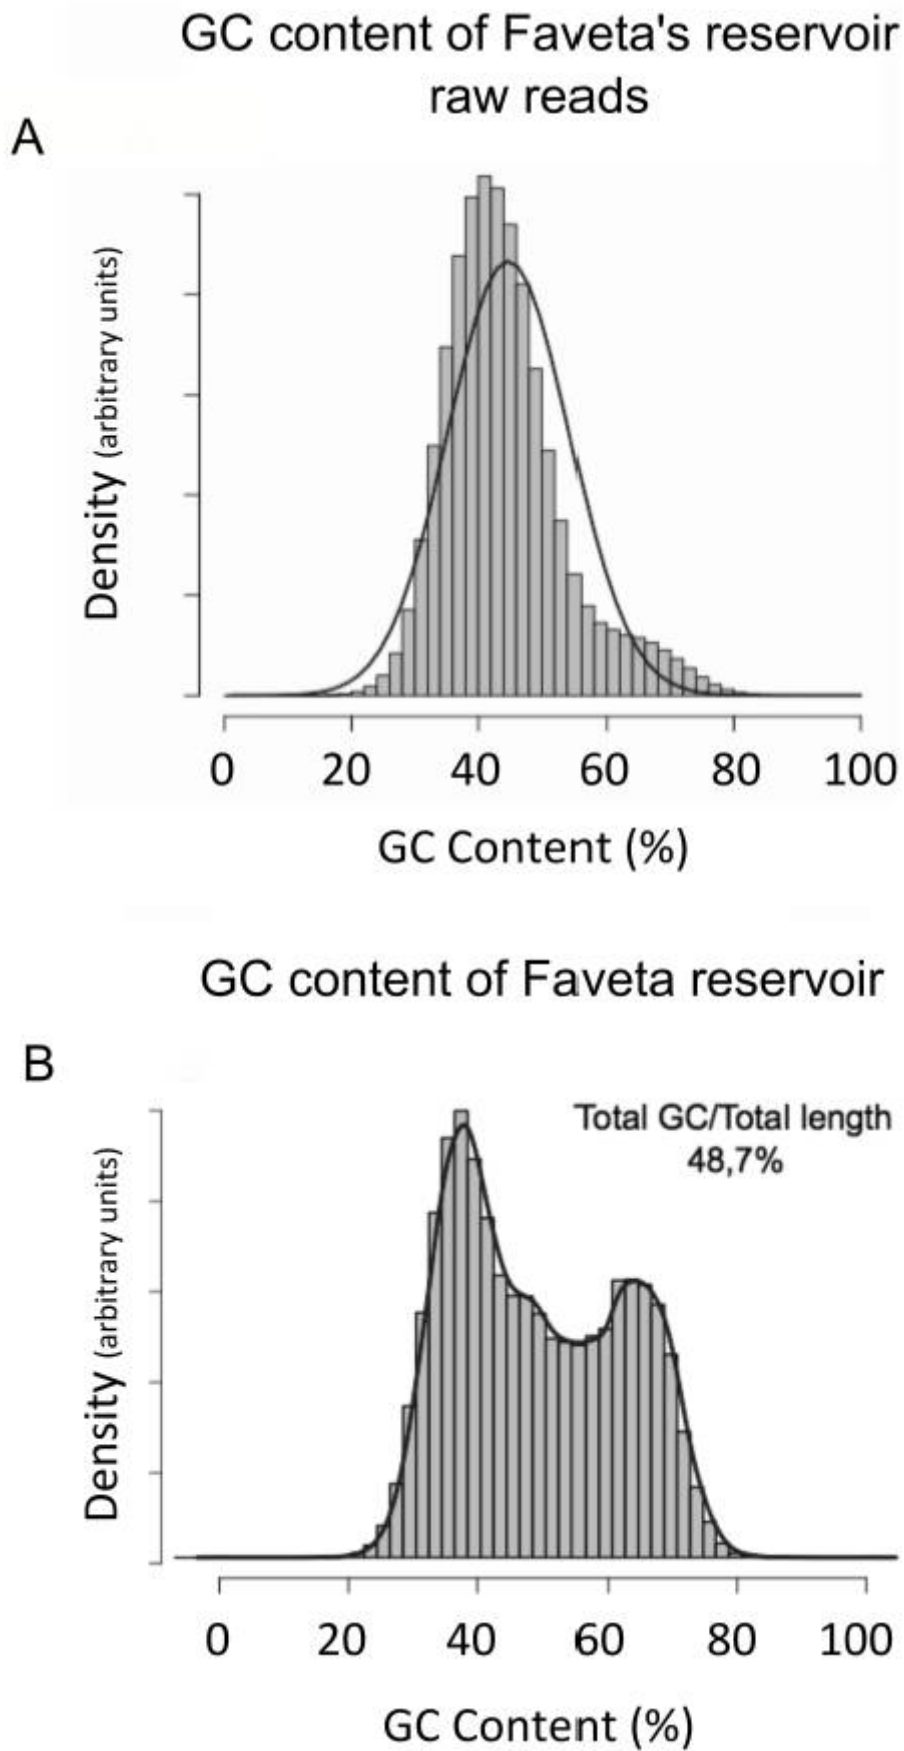

**Figure S3.** The GC content of the raw reads and the final assembled metagenome from Faveta reservoir. GC content of the raw reads and of the assembled genomes in the histograms of panels A and B, respectively.

**Table S1.** Degree of completeness and contamination and Percentage of Mapped reads.

Degree of completeness and contamination of CONCOCT bins

| Bin Id | Marker lineage               | Genomes | Markers | marker sets | 0   | 1   | 2  | 3  | 4  | 5+ | Completeness | Contamination | Strain heterogeneity |
|--------|------------------------------|---------|---------|-------------|-----|-----|----|----|----|----|--------------|---------------|----------------------|
| all    | k_Bacteria (UID203)          | 5449    | 103     | 58          | 0   | 34  | 35 | 22 | 10 | 2  | 100.00       | 69.47         | 1.66                 |
| 19     | p_Cyanobacteria (UID2192)    | 79      | 582     | 456         | 6   | 574 | 2  | 0  | 0  | 0  | 98.79        | 0.15          | 0.00                 |
| 24     | o_Actinomycetales (UID1696)  | 455     | 315     | 190         | 230 | 83  | 2  | 0  | 0  | 0  | 23.96        | 0.60          | 50.00                |
| 7      | o_Rhodospirillales (UID3754) | 63      | 336     | 201         | 259 | 71  | 6  | 0  | 0  | 0  | 22.38        | 1.52          | 16.67                |
| 3      | k_Bacteria (UID1453)         | 901     | 171     | 117         | 120 | 51  | 0  | 0  | 0  | 0  | 15.68        | 0.00          | 0.00                 |
| 16     | k_Bacteria (UID203)          | 5449    | 103     | 58          | 102 | 1   | 0  | 0  | 0  | 0  | 1.72         | 0.00          | 0.00                 |
| 26     | k_Bacteria (UID203)          | 5449    | 104     | 58          | 102 | 2   | 0  | 0  | 0  | 0  | 0.31         | 0.00          | 0.00                 |
| 27     | root (UID1)                  | 5656    | 56      | 24          | 56  | 0   | 0  | 0  | 0  | 0  | 0.00         | 0.00          | 0.00                 |
| 25     | root (UID1)                  | 5656    | 56      | 24          | 56  | 0   | 0  | 0  | 0  | 0  | 0.00         | 0.00          | 0.00                 |
| 23     | root (UID1)                  | 5656    | 56      | 24          | 56  | 0   | 0  | 0  | 0  | 0  | 0.00         | 0.00          | 0.00                 |
| 22     | root (UID1)                  | 5656    | 56      | 24          | 56  | 0   | 0  | 0  | 0  | 0  | 0.00         | 0.00          | 0.00                 |
| 21     | root (UID1)                  | 5656    | 56      | 24          | 56  | 0   | 0  | 0  | 0  | 0  | 0.00         | 0.00          | 0.00                 |
| 20     | root (UID1)                  | 5656    | 56      | 24          | 56  | 0   | 0  | 0  | 0  | 0  | 0.00         | 0.00          | 0.00                 |
| 18     | root (UID1)                  | 5656    | 56      | 24          | 56  | 0   | 0  | 0  | 0  | 0  | 0.00         | 0.00          | 0.00                 |
| 17     | root (UID1)                  | 5656    | 56      | 24          | 56  | 0   | 0  | 0  | 0  | 0  | 0.00         | 0.00          | 0.00                 |
| 15     | root (UID1)                  | 5656    | 56      | 24          | 56  | 0   | 0  | 0  | 0  | 0  | 0.00         | 0.00          | 0.00                 |
| 14     | root (UID1)                  | 5656    | 56      | 24          | 56  | 0   | 0  | 0  | 0  | 0  | 0.00         | 0.00          | 0.00                 |
| 13     | root (UID1)                  | 5656    | 56      | 24          | 56  | 0   | 0  | 0  | 0  | 0  | 0.00         | 0.00          | 0.00                 |
| 12     | root (UID1)                  | 5656    | 56      | 24          | 56  | 0   | 0  | 0  | 0  | 0  | 0.00         | 0.00          | 0.00                 |
| 11     | root (UID1)                  | 5656    | 56      | 24          | 56  | 0   | 0  | 0  | 0  | 0  | 0.00         | 0.00          | 0.00                 |
| 10     | root (UID1)                  | 5656    | 56      | 24          | 56  | 0   | 0  | 0  | 0  | 0  | 0.00         | 0.00          | 0.00                 |
| 9      | root (UID1)                  | 5656    | 56      | 24          | 56  | 0   | 0  | 0  | 0  | 0  | 0.00         | 0.00          | 0.00                 |
| 8      | root (UID1)                  | 5656    | 56      | 24          | 56  | 0   | 0  | 0  | 0  | 0  | 0.00         | 0.00          | 0.00                 |
| 6      | root (UID1)                  | 5656    | 56      | 24          | 56  | 0   | 0  | 0  | 0  | 0  | 0.00         | 0.00          | 0.00                 |
| 5      | root (UID1)                  | 5656    | 56      | 24          | 56  | 0   | 0  | 0  | 0  | 0  | 0.00         | 0.00          | 0.00                 |
| 4      | root (UID1)                  | 5656    | 56      | 24          | 56  | 0   | 0  | 0  | 0  | 0  | 0.00         | 0.00          | 0.00                 |
| 2      | root (UID1)                  | 5656    | 56      | 24          | 56  | 0   | 0  | 0  | 0  | 0  | 0.00         | 0.00          | 0.00                 |
| 1      | root (UID1)                  | 5656    | 56      | 24          | 56  | 0   | 0  | 0  | 0  | 0  | 0.00         | 0.00          | 0.00                 |
| 0      | root (UID1)                  | 5656    | 56      | 24          | 56  | 0   | 0  | 0  | 0  | 0  | 0.00         | 0.00          | 0.00                 |

Mapped reads to per bin

| Bin Id   | Bin size (Mbp) | aln.sorted.markdup.sorted: mapped reads | aln.sorted.markdup.sorted: % mapped reads | aln.sorted.markdup.sorted: % binned populations | aln.sorted.markdup.sorted: % community |
|----------|----------------|-----------------------------------------|-------------------------------------------|-------------------------------------------------|----------------------------------------|
| 0        | 0.00           | 263                                     | 0.01                                      | 5.92                                            | 5.70                                   |
| 1        | 0.00           | 32                                      | 0.00                                      | 0.32                                            | 0.31                                   |
| 2        | 0.06           | 945                                     | 0.04                                      | 0.54                                            | 0.52                                   |
| 3        | 0.42           | 7529                                    | 0.33                                      | 0.57                                            | 0.54                                   |
| 4        | 0.00           | 28                                      | 0.00                                      | 0.54                                            | 0.52                                   |
| 5        | 0.00           | 78                                      | 0.00                                      | 0.50                                            | 0.48                                   |
| 6        | 0.00           | 61                                      | 0.00                                      | 0.55                                            | 0.53                                   |
| 7        | 1.25           | 16924                                   | 0.75                                      | 0.43                                            | 0.42                                   |
| 8        | 0.01           | 4751                                    | 0.21                                      | 12.25                                           | 11.80                                  |
| 9        | 0.00           | 71                                      | 0.00                                      | 0.50                                            | 0.49                                   |
| 10       | 0.00           | 22                                      | 0.00                                      | 0.50                                            | 0.48                                   |
| 11       | 0.00           | 681                                     | 0.03                                      | 19.35                                           | 18.63                                  |
| 12       | 0.00           | 723                                     | 0.03                                      | 17.93                                           | 17.27                                  |
| 13       | 0.00           | 18                                      | 0.00                                      | 0.54                                            | 0.52                                   |
| 14       | 0.01           | 66                                      | 0.00                                      | 0.40                                            | 0.39                                   |
| 15       | 0.00           | 838                                     | 0.04                                      | 12.25                                           | 11.79                                  |
| 16       | 0.37           | 77707                                   | 3.42                                      | 6.70                                            | 6.45                                   |
| 17       | 0.00           | 65                                      | 0.00                                      | 0.58                                            | 0.56                                   |
| 18       | 0.00           | 23                                      | 0.00                                      | 0.34                                            | 0.33                                   |
| 19       | 4.61           | 2069173                                 | 91.14                                     | 14.29                                           | 13.76                                  |
| 20       | 0.00           | 51                                      | 0.00                                      | 0.75                                            | 0.72                                   |
| 21       | 0.00           | 112                                     | 0.00                                      | 0.92                                            | 0.89                                   |
| 22       | 0.00           | 100                                     | 0.00                                      | 1.39                                            | 1.34                                   |
| 23       | 0.00           | 9                                       | 0.00                                      | 0.27                                            | 0.26                                   |
| 24       | 0.38           | 4855                                    | 0.21                                      | 0.41                                            | 0.39                                   |
| 25       | 0.01           | 107                                     | 0.00                                      | 0.46                                            | 0.44                                   |
| 26       | 0.03           | 392                                     | 0.02                                      | 0.40                                            | 0.39                                   |
| 27       | 0.03           | 367                                     | 0.02                                      | 0.40                                            | 0.38                                   |
| unbinned | 4.43           | 84293                                   | 3.71                                      | NA                                              | 3.71                                   |

Degree of completeness and contamination of Spades assembly

| Bin Id | Marker lineage            | Genomes | Markers | marker sets | 0 | 1   | 2 | 3 | 4 | 5+ | Completeness | Contamination | Strain heterogeneity |
|--------|---------------------------|---------|---------|-------------|---|-----|---|---|---|----|--------------|---------------|----------------------|
| 1      | p_Cyanobacteria (UID2192) | 79      | 582     | 456         | 1 | 579 | 2 | 0 | 0 | 0  | 99.89        | 0.15          | 0.00                 |

Mapped reads from the SPADES assembly

| Bin Id | Bin size (Mbp) | aln.sorted.markdup.sorted: mapped reads | aln.sorted.markdup.sorted: % mapped reads | aln.sorted.markdup.sorted: % binned populations | aln.sorted.markdup.sorted: % community |
|--------|----------------|-----------------------------------------|-------------------------------------------|-------------------------------------------------|----------------------------------------|
| 0      | 4.97           | 2297922                                 | 100                                       | 100                                             | 100                                    |

**Table S2.** KEGG functional annotation of the predicted transcriptome of *Microcystis cf. aeruginosa* CV01.

| KEGG function categories                            |                                      | Value |
|-----------------------------------------------------|--------------------------------------|-------|
| Carbohydrate metabolism                             | Metabolism                           | 203   |
| Energy metabolism                                   | Metabolism                           | 182   |
| Lipid metabolism                                    | Metabolism                           | 40    |
| Nucleotide metabolism                               | Metabolism                           | 82    |
| Amino acid metabolism                               | Metabolism                           | 169   |
| Metabolism of other amino acids                     | Metabolism                           | 35    |
| Glycan biosynthesis and metabolism                  | Metabolism                           | 24    |
| Metabolism of cofactors and vitamins                | Metabolism                           | 139   |
| Metabolism of terpenoids and polyketides            | Metabolism                           | 36    |
| Biosynthesis of other secondary metabolites         | Metabolism                           | 25    |
| Xenobiotics biodegradation and metabolism           | Metabolism                           | 26    |
| Transcription                                       | Genetic Information Processing       | 4     |
| Translation                                         | Genetic Information Processing       | 80    |
| Folding, sorting and degradation                    | Genetic Information Processing       | 37    |
| Replication and repair                              | Genetic Information Processing       | 56    |
| Membrane transport                                  | Environmental Information Processing | 76    |
| Signal transduction                                 | Environmental Information Processing | 42    |
| Transport and catabolism                            | Environmental Information Processing | 3     |
| Cell growth and death                               | Cellular Processes                   | 14    |
| Immune system                                       | Organismal Systems                   | 2     |
| Endocrine system                                    | Organismal Systems                   | 14    |
| Digestive system                                    | Organismal Systems                   | 2     |
| Excretory system                                    | Organismal Systems                   | 1     |
| Nervous system                                      | Organismal Systems                   | 7     |
| Aging                                               | Organismal Systems                   | 8     |
| Environmental adaptation                            | Organismal Systems                   | 1     |
| Other functions                                     |                                      | 86    |
| Total protein coding genes with function prediction |                                      | 1394  |
| Proteins with no KEGG Orthology assignment          |                                      | 3233  |

**Table S3.** COG functional categories of the predicted transcriptome of *Microcystis cf. aeruginosa* CV01.

| <b>Number of genes associated with general COG functional categories.</b> |              |             |                                                              |
|---------------------------------------------------------------------------|--------------|-------------|--------------------------------------------------------------|
| <b>Code</b>                                                               | <b>Value</b> | <b>%age</b> | <b>Description</b>                                           |
| J                                                                         | 197          | 4,88        | Translation, ribosomal structure and biogenesis              |
| A                                                                         | 0            | 0,00        | RNA processing and modification                              |
| K                                                                         | 289          | 7,71        | Transcription                                                |
| L                                                                         | 391          | 8,41        | Replication, recombination and repair                        |
| B                                                                         | 0            | 0,02        | Chromatin structure and dynamics                             |
| D                                                                         | 112          | 2,74        | Cell cycle control, Cell division, chromosome partitioning   |
| V                                                                         | 173          | 3,70        | Defense mechanisms                                           |
| T                                                                         | 340          | 9,08        | Signal transduction mechanisms                               |
| M                                                                         | 372          | 9,61        | Cell wall/membrane biogenesis                                |
| N                                                                         | 49           | 1,78        | Cell motility                                                |
| U                                                                         | 111          | 2,91        | Intracellular trafficking and secretion                      |
| O                                                                         | 326          | 8,20        | Posttranslational modification, protein turnover, chaperones |
| C                                                                         | 344          | 9,87        | Energy production and conversion                             |
| G                                                                         | 235          | 6,98        | Carbohydrate transport and metabolism                        |
| E                                                                         | 386          | 11,02       | Amino acid transport and metabolism                          |
| F                                                                         | 117          | 3,00        | Nucleotide transport and metabolism                          |
| H                                                                         | 326          | 8,82        | Coenzyme transport and metabolism                            |
| I                                                                         | 137          | 3,83        | Lipid transport and metabolism                               |
| P                                                                         | 334          | 10,23       | Inorganic ion transport and metabolism                       |
| Q                                                                         | 228          | 5,91        | Secondary metabolites biosynthesis, transport and catabolism |
| R                                                                         | 0            | 0,00        | General function prediction only                             |
| S                                                                         | 2679         | 57,34       | Function unknown                                             |
| -                                                                         | -            |             | Not in COGs                                                  |
